# Supplementary material for: Gene Suppression Therapies in Hereditary Cerebellar Ataxias: A Systematic Review of Animal Studies
Source: Cells. 2023 Mar 29;12(7):1037. doi: 10.3390/cells12071037 (PMC10093402; doi:10.3390/cells12071037)
Supplement: Supplementary file 1 [file cells-12-01037-s001.zip › cells-2216638-supplementary.pdf]

Supplementary Materials

Table S1- Standardized Sheet for Data Extraction

| Author | Year | Type<br>HCA | Type<br>GST | Aim | Intervention |           |           |        | Categories Analysed     |                   |                   | Outcome Results |                    | Key conclusions of<br>study authors |
|--------|------|-------------|-------------|-----|--------------|-----------|-----------|--------|-------------------------|-------------------|-------------------|-----------------|--------------------|-------------------------------------|
|        |      |             |             |     | Control 1    | Control 2 | Control 3 | Others | Suppression<br>efficacy | Motor<br>Behavior | Safety<br>Profile | Outcome         | Overall<br>Results |                                     |
